# Supplementary material
Source: PubMed Central journal article supplement (PMC6648161)
Supplement: ao8b02813_si_001.pdf [file ao8b02813_si_001.pdf]

*Supporting Information for:*

**Roles of Closed- and Open-loop Conformations in Large-scale Structural Transitions of L-Lactate Dehydrogenase**

Kimichi Suzuki,<sup>a,b,\*</sup> Satoshi Maeda,<sup>a,c,\*</sup> and Keiji Morokuma<sup>b</sup>

<sup>a</sup>*Department of Chemistry, Faculty of Science, Hokkaido University, Sapporo 060-0810, Japan*

<sup>b</sup>*Fukui Institute for Fundamental Chemistry, Kyoto University, Kyoto 606-8103, Japan*

<sup>c</sup>*Research and Services Division of Materials Data and Integrated System (MaDIS), National Institute for Materials Science (NIMS), Tsukuba, 305-0044, Japan*

\* To whom correspondence should be addressed. Email: [ki\\_suzuki@eis.hokudai.ac.jp](mailto:ki_suzuki@eis.hokudai.ac.jp) or [smaeda@eis.hokudai.ac.jp](mailto:smaeda@eis.hokudai.ac.jp).

Contents:

1. Illustration of distance between key residues,  $C\alpha$ -Glu103 and  $C\alpha$ -Tyr238, O3-pyruvate and CZ-Arg105, O1-pyruvate and CZ-Arg105, and CZ-Arg105 and CZ-Arg168, respectively. The notations of *o* and *c* in parenthesis refer to open- and closed- loop conformations, respectively. Blue and yellow arrows refer to distances in closed- and open-loop conformations, respectively.....S3
2. Distances between  $C\alpha$ -Glu103 and  $C\alpha$ -Tyr238, O3-pyruvate and CZ-Arg105, O1-pyruvate and CZ-Arg105, and CZ-Arg105 and CZ-Arg168, and O1-pyruvate and CZ-Arg168, and O3-pyruvate and CZ-Arg168 at stationary points. Unit in (Å).....S4
3. Distances during replica-exchange MD in a) closed- and b) open-loop conformations. Distances were defined in Figure S1. Unit in (Å).....S5
4. Cartesian coordinates of the reaction center for all structures described in Figure 4.....S6
5. Full Reference of the Gaussian 09 program .....S30

Figure S1. Illustration of distance between key residues,  $\text{C}\alpha$ -Glu103 and  $\text{C}\alpha$ -Tyr238, O3-pyruvate and CZ-Arg105, O1-pyruvate and CZ-Arg105, and CZ-Arg105 and CZ-Arg168, respectively. The notations of *o* and *c* in parenthesis refer to open- and closed- loop conformations, respectively. Blue and yellow arrows refer to distances in closed- and open-loop conformations, respectively.

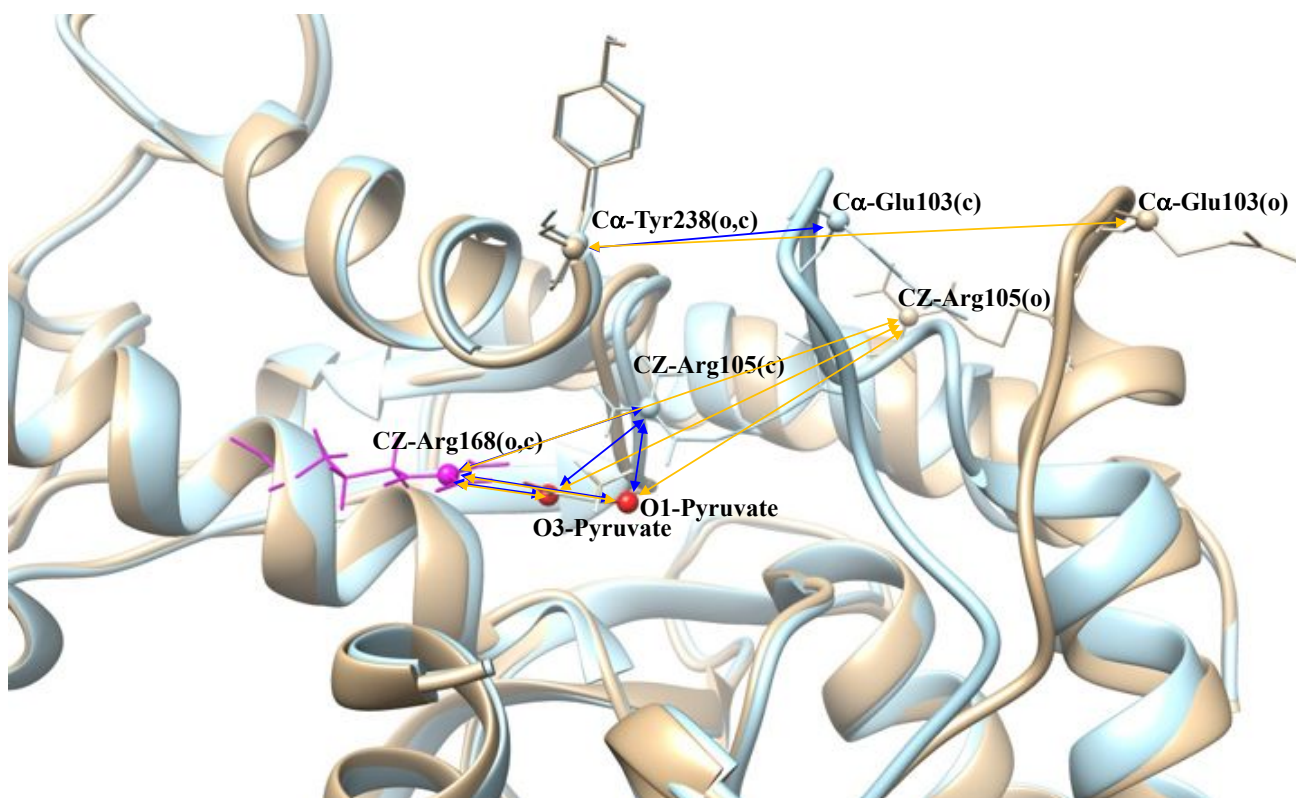

**Table S1. Distances between  $C\alpha$ -Glu103 and  $C\alpha$ -Tyr238, O3-pyruvate and CZ-Arg105, O1-pyruvate and CZ-Arg105, and CZ-Arg105 and CZ-Arg168, and O1-pyruvate and CZ-Arg168, and O3-pyruvate and CZ-Arg168 at stationary points. Unit in (Å)**

|                 | Glu103_Try238 | O3_Arg105 | O1_Arg105 | Arg105_Arg168 | O1_Arg168 |
|-----------------|---------------|-----------|-----------|---------------|-----------|
| Exp(Closed)     | 8.0           | 3.9       | 4.5       | 7.2           | 6.2       |
| Exp(Open)       | 17.9          | 12.0      | 15.2      | 18.6          | 6.8       |
| <i>c</i> EQ1    | 8.2           | 3.7       | 3.6       | 5.9           | 6.1       |
| <i>m(o)</i> EQ1 | 15.6          | 11.8      | 13.3      | 15.8          | 6.1       |
| <i>c</i> TS1    | 8.4           | 3.9       | 3.4       | 6.2           | 6.2       |
| <i>mSSTS1</i>   | 8.5           | 3.9       | 3.6       | 6.3           | 6.1       |
|                 | 14.7          | 11.8      | 12.9      | 15.7          |           |
| <i>m(c)</i> EQ2 | 8.5           | 4.0       | 3.4       | 6.3           | 6.1       |
| <i>m(c)</i> TS2 | 8.5           | 4.2       | 3.4       | 6.3           | 6.2       |
| <i>o</i> TS2    | 15.5          | 10.4      | 11.5      | 14.6          | 6.2       |
| <i>m(c)</i> EQ3 | 8.6           | 4.3       | 3.4       | 6.2           | 6.1       |
| <i>c</i> TS3    | 8.6           | 4.4       | 3.3       | 6.2           | 6.1       |
| <i>mSSTS3</i>   | 8.6           | 4.2       | 3.4       | 6.1           | 6.1       |
|                 | 13.1          | 12.1      | 12.9      | 15.6          |           |
| <i>c</i> EQ4    | 8.5           | 4.3       | 3.3       | 6.2           | 6.1       |
| <i>m(o)</i> EQ4 | 15.5          | 10.6      | 12.2      | 14.8          | 6.2       |

**Figure S2. Distances during replica-exchange MD in a) closed- and b) open-loop conformations. Distances were defined in Figure S1. Unit in (Å)**

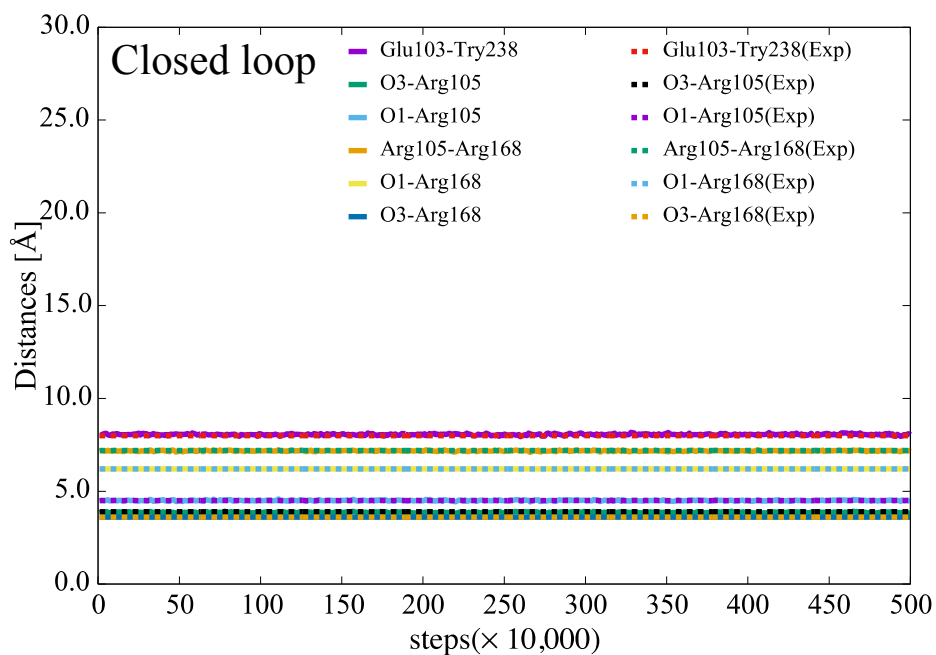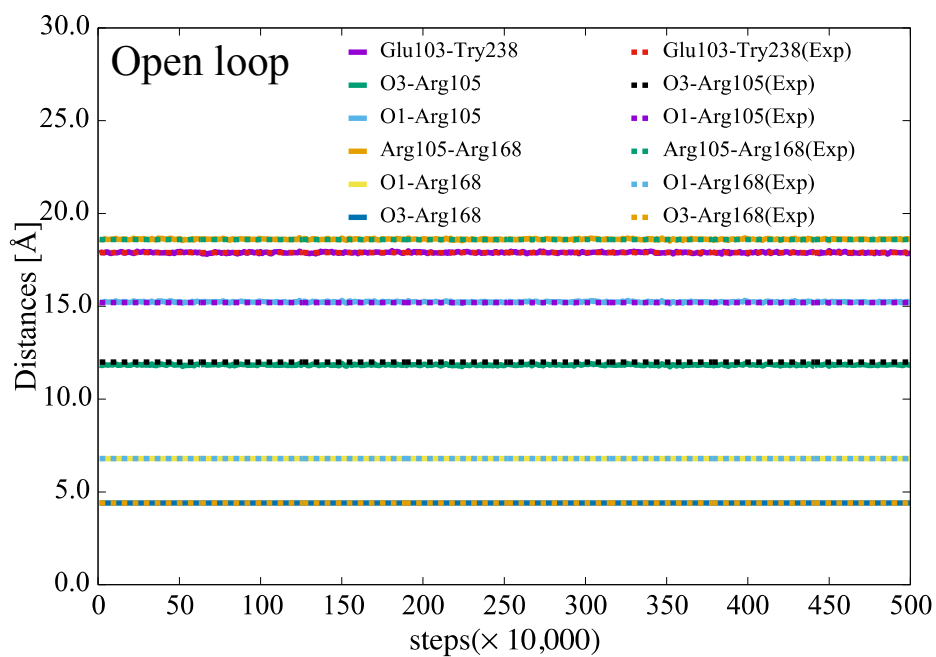

### Cartesian coordinates of the reaction center for all structures described in Figure 4:

| REMARK | o(m)EQ1 |      |     |     |        |         |        |      |      |
|--------|---------|------|-----|-----|--------|---------|--------|------|------|
| ATOM   | 1       | C1   | PYA | 1   | -0.325 | -17.524 | 21.547 | 1.00 | 0.00 |
| ATOM   | 2       | O1   | PYA | 1   | -1.152 | -18.428 | 21.504 | 1.00 | 0.00 |
| ATOM   | 3       | C2   | PYA | 1   | 0.843  | -17.478 | 20.523 | 1.00 | 0.00 |
| ATOM   | 4       | O2   | PYA | 1   | 1.791  | -16.692 | 20.774 | 1.00 | 0.00 |
| ATOM   | 5       | O3   | PYA | 1   | 0.684  | -18.194 | 19.492 | 1.00 | 0.00 |
| ATOM   | 6       | C3   | PYA | 1   | -0.409 | -16.392 | 22.522 | 1.00 | 0.00 |
| ATOM   | 7       | H1   | PYA | 1   | 0.518  | -16.306 | 23.094 | 1.00 | 0.00 |
| ATOM   | 8       | H2   | PYA | 1   | -0.515 | -15.462 | 21.954 | 1.00 | 0.00 |
| ATOM   | 9       | H3   | PYA | 1   | -1.281 | -16.514 | 23.162 | 1.00 | 0.00 |
| ATOM   | 10      | C1   | NAD | 2   | -3.176 | -15.676 | 19.694 | 1.00 | 0.00 |
| ATOM   | 11      | H1   | NAD | 2   | -3.261 | -15.143 | 18.744 | 1.00 | 0.00 |
| ATOM   | 12      | H2   | NAD | 2   | -2.213 | -16.208 | 19.628 | 1.00 | 0.00 |
| ATOM   | 13      | C2   | NAD | 2   | -4.304 | -16.679 | 19.844 | 1.00 | 0.00 |
| ATOM   | 14      | C3   | NAD | 2   | -4.547 | -17.617 | 18.730 | 1.00 | 0.00 |
| ATOM   | 15      | O1   | NAD | 2   | -4.119 | -17.396 | 17.594 | 1.00 | 0.00 |
| ATOM   | 16      | N1   | NAD | 2   | -5.342 | -18.738 | 18.945 | 1.00 | 0.00 |
| ATOM   | 17      | H3   | NAD | 2   | -5.378 | -19.116 | 19.892 | 1.00 | 0.00 |
| ATOM   | 18      | H4   | NAD | 2   | -5.202 | -19.462 | 18.255 | 1.00 | 0.00 |
| ATOM   | 19      | C4   | NAD | 2   | -3.176 | -14.719 | 20.864 | 1.00 | 0.00 |
| ATOM   | 20      | H5   | NAD | 2   | -2.404 | -13.960 | 20.915 | 1.00 | 0.00 |
| ATOM   | 21      | C5   | NAD | 2   | -5.163 | -16.620 | 20.887 | 1.00 | 0.00 |
| ATOM   | 22      | H6   | NAD | 2   | -5.962 | -17.343 | 20.966 | 1.00 | 0.00 |
| ATOM   | 23      | C6   | NAD | 2   | -4.090 | -14.741 | 21.841 | 1.00 | 0.00 |
| ATOM   | 24      | H7   | NAD | 2   | -4.077 | -14.062 | 22.685 | 1.00 | 0.00 |
| ATOM   | 25      | N2   | NAD | 2   | -5.134 | -15.676 | 21.880 | 1.00 | 0.00 |
| ATOM   | 26      | C7   | NAD | 2   | -6.271 | -15.512 | 22.770 | 1.00 | 0.00 |
| ATOM   | 2713    | CD   | ARG | 170 | 4.143  | -18.797 | 15.544 | 1.00 | 0.00 |
| ATOM   | 2716    | NE   | ARG | 170 | 4.404  | -17.968 | 16.737 | 1.00 | 0.00 |
| ATOM   | 2717    | HE   | ARG | 170 | 5.338  | -18.099 | 17.117 | 1.00 | 0.00 |
| ATOM   | 2718    | CZ   | ARG | 170 | 3.467  | -17.634 | 17.668 | 1.00 | 0.00 |
| ATOM   | 2719    | NH1  | ARG | 170 | 3.886  | -17.253 | 18.885 | 1.00 | 0.00 |
| ATOM   | 2720    | HH11 | ARG | 170 | 4.784  | -17.669 | 19.135 | 1.00 | 0.00 |
| ATOM   | 2721    | HH12 | ARG | 170 | 3.173  | -17.158 | 19.628 | 1.00 | 0.00 |
| ATOM   | 2722    | NH2  | ARG | 170 | 2.169  | -17.546 | 17.348 | 1.00 | 0.00 |
| ATOM   | 2723    | HH21 | ARG | 170 | 1.977  | -18.048 | 16.485 | 1.00 | 0.00 |

|      |      |      |     |     |        |         |        |      |      |
|------|------|------|-----|-----|--------|---------|--------|------|------|
| ATOM | 2724 | HH22 | ARG | 170 | 1.518  | -17.795 | 18.139 | 1.00 | 0.00 |
| ATOM | 3096 | CB   | HIP | 194 | -3.491 | -22.949 | 17.933 | 1.00 | 0.00 |
| ATOM | 3099 | CG   | HIP | 194 | -2.598 | -21.820 | 18.358 | 1.00 | 0.00 |
| ATOM | 3100 | ND1  | HIP | 194 | -1.446 | -21.471 | 17.694 | 1.00 | 0.00 |
| ATOM | 3101 | HD1  | HIP | 194 | -1.079 | -21.930 | 16.851 | 1.00 | 0.00 |
| ATOM | 3102 | CE1  | HIP | 194 | -0.806 | -20.511 | 18.376 | 1.00 | 0.00 |
| ATOM | 3103 | HE1  | HIP | 194 | 0.135  | -20.068 | 18.099 | 1.00 | 0.00 |
| ATOM | 3104 | NE2  | HIP | 194 | -1.524 | -20.233 | 19.459 | 1.00 | 0.00 |
| ATOM | 3105 | HE2  | HIP | 194 | -1.258 | -19.518 | 20.180 | 1.00 | 0.00 |
| ATOM | 3106 | CD2  | HIP | 194 | -2.643 | -21.039 | 19.474 | 1.00 | 0.00 |
| ATOM | 3107 | HD2  | HIP | 194 | -3.361 | -21.018 | 20.269 | 1.00 | 0.00 |

END

## REMARK oTS2

|      |      |      |     |     |        |         |        |      |      |
|------|------|------|-----|-----|--------|---------|--------|------|------|
| ATOM | 1    | C1   | PYA | 1   | -0.892 | -17.371 | 21.236 | 1.00 | 0.00 |
| ATOM | 2    | O1   | PYA | 1   | -1.567 | -18.499 | 21.271 | 1.00 | 0.00 |
| ATOM | 3    | C2   | PYA | 1   | 0.388  | -17.218 | 20.376 | 1.00 | 0.00 |
| ATOM | 4    | O2   | PYA | 1   | 1.057  | -16.170 | 20.569 | 1.00 | 0.00 |
| ATOM | 5    | O3   | PYA | 1   | 0.607  | -18.184 | 19.601 | 1.00 | 0.00 |
| ATOM | 6    | C3   | PYA | 1   | -0.855 | -16.609 | 22.525 | 1.00 | 0.00 |
| ATOM | 7    | H1   | PYA | 1   | 0.015  | -16.957 | 23.086 | 1.00 | 0.00 |
| ATOM | 8    | H2   | PYA | 1   | -0.707 | -15.559 | 22.292 | 1.00 | 0.00 |
| ATOM | 9    | H3   | PYA | 1   | -1.756 | -16.762 | 23.119 | 1.00 | 0.00 |
| ATOM | 10   | C1   | NAD | 2   | -2.655 | -15.760 | 20.048 | 1.00 | 0.00 |
| ATOM | 11   | H1   | NAD | 2   | -2.197 | -15.529 | 19.087 | 1.00 | 0.00 |
| ATOM | 12   | H2   | NAD | 2   | -1.701 | -16.482 | 20.485 | 1.00 | 0.00 |
| ATOM | 13   | C2   | NAD | 2   | -3.810 | -16.660 | 19.973 | 1.00 | 0.00 |
| ATOM | 14   | C3   | NAD | 2   | -3.908 | -17.555 | 18.775 | 1.00 | 0.00 |
| ATOM | 15   | O1   | NAD | 2   | -3.310 | -17.244 | 17.748 | 1.00 | 0.00 |
| ATOM | 16   | N1   | NAD | 2   | -4.731 | -18.652 | 18.844 | 1.00 | 0.00 |
| ATOM | 17   | H3   | NAD | 2   | -4.907 | -19.043 | 19.771 | 1.00 | 0.00 |
| ATOM | 18   | H4   | NAD | 2   | -4.528 | -19.371 | 18.159 | 1.00 | 0.00 |
| ATOM | 19   | C4   | NAD | 2   | -2.833 | -14.659 | 20.988 | 1.00 | 0.00 |
| ATOM | 20   | H5   | NAD | 2   | -2.135 | -13.837 | 20.995 | 1.00 | 0.00 |
| ATOM | 21   | C5   | NAD | 2   | -4.782 | -16.587 | 20.922 | 1.00 | 0.00 |
| ATOM | 22   | H6   | NAD | 2   | -5.599 | -17.291 | 20.936 | 1.00 | 0.00 |
| ATOM | 23   | C6   | NAD | 2   | -3.849 | -14.649 | 21.882 | 1.00 | 0.00 |
| ATOM | 24   | H7   | NAD | 2   | -3.986 | -13.881 | 22.627 | 1.00 | 0.00 |
| ATOM | 25   | N2   | NAD | 2   | -4.831 | -15.616 | 21.884 | 1.00 | 0.00 |
| ATOM | 26   | C7   | NAD | 2   | -6.004 | -15.471 | 22.742 | 1.00 | 0.00 |
| ATOM | 2713 | CD   | ARG | 170 | 4.416  | -18.685 | 15.600 | 1.00 | 0.00 |
| ATOM | 2716 | NE   | ARG | 170 | 4.332  | -17.719 | 16.715 | 1.00 | 0.00 |
| ATOM | 2717 | HE   | ARG | 170 | 5.228  | -17.358 | 17.010 | 1.00 | 0.00 |
| ATOM | 2718 | CZ   | ARG | 170 | 3.298  | -17.616 | 17.595 | 1.00 | 0.00 |
| ATOM | 2719 | NH1  | ARG | 170 | 3.353  | -16.685 | 18.552 | 1.00 | 0.00 |
| ATOM | 2720 | HH11 | ARG | 170 | 4.204  | -16.164 | 18.663 | 1.00 | 0.00 |
| ATOM | 2721 | HH12 | ARG | 170 | 2.671  | -16.727 | 19.313 | 1.00 | 0.00 |
| ATOM | 2722 | NH2  | ARG | 170 | 2.186  | -18.341 | 17.459 | 1.00 | 0.00 |
| ATOM | 2723 | HH21 | ARG | 170 | 2.389  | -19.264 | 17.047 | 1.00 | 0.00 |
| ATOM | 2724 | HH22 | ARG | 170 | 1.539  | -18.362 | 18.278 | 1.00 | 0.00 |
| ATOM | 3096 | CB   | HIP | 194 | -3.586 | -23.303 | 17.897 | 1.00 | 0.00 |



|      |      |     |     |     |        |         |        |      |      |
|------|------|-----|-----|-----|--------|---------|--------|------|------|
| ATOM | 3099 | CG  | HIP | 194 | -2.785 | -22.102 | 18.323 | 1.00 | 0.00 |
| ATOM | 3100 | ND1 | HIP | 194 | -1.643 | -21.703 | 17.678 | 1.00 | 0.00 |
| ATOM | 3101 | HD1 | HIP | 194 | -1.196 | -22.159 | 16.878 | 1.00 | 0.00 |
| ATOM | 3102 | CE1 | HIP | 194 | -1.088 | -20.687 | 18.383 | 1.00 | 0.00 |
| ATOM | 3103 | HE1 | HIP | 194 | -0.160 | -20.234 | 18.070 | 1.00 | 0.00 |
| ATOM | 3104 | NE2 | HIP | 194 | -1.819 | -20.396 | 19.443 | 1.00 | 0.00 |
| ATOM | 3105 | HE2 | HIP | 194 | -1.489 | -19.155 | 20.468 | 1.00 | 0.00 |
| ATOM | 3106 | CD2 | HIP | 194 | -2.883 | -21.286 | 19.422 | 1.00 | 0.00 |
| ATOM | 3107 | HD2 | HIP | 194 | -3.632 | -21.308 | 20.197 | 1.00 | 0.00 |

END

## REMARK oEQ4

|      |      |      |     |     |        |         |        |      |      |
|------|------|------|-----|-----|--------|---------|--------|------|------|
| ATOM | 1    | C1   | PYA | 1   | -0.300 | -17.423 | 20.915 | 1.00 | 0.00 |
| ATOM | 2    | O1   | PYA | 1   | 0.491  | -18.457 | 20.317 | 1.00 | 0.00 |
| ATOM | 3    | C2   | PYA | 1   | 0.383  | -16.033 | 20.735 | 1.00 | 0.00 |
| ATOM | 4    | O2   | PYA | 1   | -0.340 | -15.027 | 20.949 | 1.00 | 0.00 |
| ATOM | 5    | O3   | PYA | 1   | 1.619  | -15.954 | 20.465 | 1.00 | 0.00 |
| ATOM | 6    | C3   | PYA | 1   | -0.486 | -17.686 | 22.407 | 1.00 | 0.00 |
| ATOM | 7    | H1   | PYA | 1   | 0.483  | -17.646 | 22.906 | 1.00 | 0.00 |
| ATOM | 8    | H2   | PYA | 1   | -1.144 | -16.928 | 22.837 | 1.00 | 0.00 |
| ATOM | 9    | H3   | PYA | 1   | -0.930 | -18.677 | 22.568 | 1.00 | 0.00 |
| ATOM | 10   | C1   | NAD | 2   | -3.091 | -15.311 | 19.661 | 1.00 | 0.00 |
| ATOM | 11   | H1   | NAD | 2   | -2.317 | -15.326 | 18.904 | 1.00 | 0.00 |
| ATOM | 12   | H2   | NAD | 2   | -1.277 | -17.400 | 20.412 | 1.00 | 0.00 |
| ATOM | 13   | C2   | NAD | 2   | -4.109 | -16.276 | 19.678 | 1.00 | 0.00 |
| ATOM | 14   | C3   | NAD | 2   | -4.324 | -17.312 | 18.580 | 1.00 | 0.00 |
| ATOM | 15   | O1   | NAD | 2   | -4.838 | -16.976 | 17.521 | 1.00 | 0.00 |
| ATOM | 16   | N1   | NAD | 2   | -3.922 | -18.562 | 18.892 | 1.00 | 0.00 |
| ATOM | 17   | H3   | NAD | 2   | -3.563 | -18.808 | 19.813 | 1.00 | 0.00 |
| ATOM | 18   | H4   | NAD | 2   | -3.997 | -19.335 | 18.246 | 1.00 | 0.00 |
| ATOM | 19   | C4   | NAD | 2   | -3.048 | -14.344 | 20.670 | 1.00 | 0.00 |
| ATOM | 20   | H5   | NAD | 2   | -2.219 | -13.653 | 20.718 | 1.00 | 0.00 |
| ATOM | 21   | C5   | NAD | 2   | -5.041 | -16.220 | 20.693 | 1.00 | 0.00 |
| ATOM | 22   | H6   | NAD | 2   | -5.804 | -16.976 | 20.790 | 1.00 | 0.00 |
| ATOM | 23   | C6   | NAD | 2   | -4.046 | -14.307 | 21.625 | 1.00 | 0.00 |
| ATOM | 24   | H7   | NAD | 2   | -4.094 | -13.592 | 22.433 | 1.00 | 0.00 |
| ATOM | 25   | N2   | NAD | 2   | -5.032 | -15.243 | 21.624 | 1.00 | 0.00 |
| ATOM | 26   | C7   | NAD | 2   | -6.160 | -15.163 | 22.552 | 1.00 | 0.00 |
| ATOM | 2713 | CD   | ARG | 170 | 3.528  | -18.963 | 15.685 | 1.00 | 0.00 |
| ATOM | 2716 | NE   | ARG | 170 | 3.812  | -18.211 | 16.928 | 1.00 | 0.00 |
| ATOM | 2717 | HE   | ARG | 170 | 4.778  | -18.278 | 17.235 | 1.00 | 0.00 |
| ATOM | 2718 | CZ   | ARG | 170 | 2.918  | -17.922 | 17.924 | 1.00 | 0.00 |
| ATOM | 2719 | NH1  | ARG | 170 | 3.326  | -17.290 | 19.006 | 1.00 | 0.00 |
| ATOM | 2720 | HH11 | ARG | 170 | 4.326  | -17.201 | 19.119 | 1.00 | 0.00 |
| ATOM | 2721 | HH12 | ARG | 170 | 2.618  | -16.980 | 19.740 | 1.00 | 0.00 |
| ATOM | 2722 | NH2  | ARG | 170 | 1.599  | -18.205 | 17.757 | 1.00 | 0.00 |
| ATOM | 2723 | HH21 | ARG | 170 | 1.551  | -19.091 | 17.233 | 1.00 | 0.00 |
| ATOM | 2724 | HH22 | ARG | 170 | 1.093  | -18.306 | 18.653 | 1.00 | 0.00 |
| ATOM | 3096 | CB   | HIP | 194 | -3.608 | -23.130 | 17.959 | 1.00 | 0.00 |

|      |      |     |     |     |        |         |        |      |      |
|------|------|-----|-----|-----|--------|---------|--------|------|------|
| ATOM | 3099 | CG  | HIP | 194 | -2.709 | -22.025 | 18.418 | 1.00 | 0.00 |
| ATOM | 3100 | ND1 | HIP | 194 | -1.652 | -21.576 | 17.673 | 1.00 | 0.00 |
| ATOM | 3101 | HD1 | HIP | 194 | -1.317 | -21.997 | 16.800 | 1.00 | 0.00 |
| ATOM | 3102 | CE1 | HIP | 194 | -0.945 | -20.716 | 18.447 | 1.00 | 0.00 |
| ATOM | 3103 | HE1 | HIP | 194 | -0.044 | -20.254 | 18.081 | 1.00 | 0.00 |
| ATOM | 3104 | NE2 | HIP | 194 | -1.493 | -20.562 | 19.637 | 1.00 | 0.00 |
| ATOM | 3105 | HE2 | HIP | 194 | -0.025 | -19.286 | 20.401 | 1.00 | 0.00 |
| ATOM | 3106 | CD2 | HIP | 194 | -2.600 | -21.396 | 19.632 | 1.00 | 0.00 |
| ATOM | 3107 | HD2 | HIP | 194 | -3.236 | -21.515 | 20.492 | 1.00 | 0.00 |

END

## REMARK cEQ1

|      |      |      |     |     |        |         |        |      |      |
|------|------|------|-----|-----|--------|---------|--------|------|------|
| ATOM | 1    | C1   | PYA | 1   | -0.351 | -17.563 | 21.422 | 1.00 | 0.00 |
| ATOM | 2    | O1   | PYA | 1   | -1.105 | -18.524 | 21.433 | 1.00 | 0.00 |
| ATOM | 3    | C2   | PYA | 1   | 0.639  | -17.409 | 20.230 | 1.00 | 0.00 |
| ATOM | 4    | O2   | PYA | 1   | 1.261  | -16.322 | 20.124 | 1.00 | 0.00 |
| ATOM | 5    | O3   | PYA | 1   | 0.745  | -18.450 | 19.516 | 1.00 | 0.00 |
| ATOM | 6    | C3   | PYA | 1   | -0.288 | -16.570 | 22.544 | 1.00 | 0.00 |
| ATOM | 7    | H1   | PYA | 1   | 0.724  | -16.535 | 22.959 | 1.00 | 0.00 |
| ATOM | 8    | H2   | PYA | 1   | -0.523 | -15.565 | 22.185 | 1.00 | 0.00 |
| ATOM | 9    | H3   | PYA | 1   | -1.007 | -16.858 | 23.310 | 1.00 | 0.00 |
| ATOM | 10   | C1   | NAD | 2   | -2.711 | -15.642 | 20.003 | 1.00 | 0.00 |
| ATOM | 11   | H1   | NAD | 2   | -2.620 | -15.225 | 19.001 | 1.00 | 0.00 |
| ATOM | 12   | H2   | NAD | 2   | -1.730 | -16.095 | 20.182 | 1.00 | 0.00 |
| ATOM | 13   | C2   | NAD | 2   | -3.799 | -16.694 | 20.040 | 1.00 | 0.00 |
| ATOM | 14   | C3   | NAD | 2   | -3.836 | -17.659 | 18.932 | 1.00 | 0.00 |
| ATOM | 15   | O1   | NAD | 2   | -2.889 | -17.752 | 18.136 | 1.00 | 0.00 |
| ATOM | 16   | N1   | NAD | 2   | -4.949 | -18.476 | 18.777 | 1.00 | 0.00 |
| ATOM | 17   | H3   | NAD | 2   | -5.809 | -18.241 | 19.269 | 1.00 | 0.00 |
| ATOM | 18   | H4   | NAD | 2   | -5.104 | -18.876 | 17.857 | 1.00 | 0.00 |
| ATOM | 19   | C4   | NAD | 2   | -2.997 | -14.567 | 21.021 | 1.00 | 0.00 |
| ATOM | 20   | H5   | NAD | 2   | -2.354 | -13.697 | 21.039 | 1.00 | 0.00 |
| ATOM | 21   | C5   | NAD | 2   | -4.723 | -16.699 | 21.028 | 1.00 | 0.00 |
| ATOM | 22   | H6   | NAD | 2   | -5.408 | -17.528 | 21.133 | 1.00 | 0.00 |
| ATOM | 23   | C6   | NAD | 2   | -3.994 | -14.635 | 21.909 | 1.00 | 0.00 |
| ATOM | 24   | H7   | NAD | 2   | -4.196 | -13.861 | 22.635 | 1.00 | 0.00 |
| ATOM | 25   | N2   | NAD | 2   | -4.867 | -15.733 | 21.982 | 1.00 | 0.00 |
| ATOM | 26   | C7   | NAD | 2   | -6.101 | -15.683 | 22.746 | 1.00 | 0.00 |
| ATOM | 2713 | CD   | ARG | 170 | 5.018  | -18.743 | 15.879 | 1.00 | 0.00 |
| ATOM | 2716 | NE   | ARG | 170 | 4.673  | -17.689 | 16.850 | 1.00 | 0.00 |
| ATOM | 2717 | HE   | ARG | 170 | 5.388  | -16.994 | 17.026 | 1.00 | 0.00 |
| ATOM | 2718 | CZ   | ARG | 170 | 3.530  | -17.579 | 17.579 | 1.00 | 0.00 |
| ATOM | 2719 | NH1  | ARG | 170 | 3.340  | -16.459 | 18.292 | 1.00 | 0.00 |
| ATOM | 2720 | HH11 | ARG | 170 | 4.214  | -15.970 | 18.487 | 1.00 | 0.00 |
| ATOM | 2721 | HH12 | ARG | 170 | 2.577  | -16.430 | 19.000 | 1.00 | 0.00 |
| ATOM | 2722 | NH2  | ARG | 170 | 2.581  | -18.513 | 17.524 | 1.00 | 0.00 |
| ATOM | 2723 | HH21 | ARG | 170 | 2.926  | -19.426 | 17.200 | 1.00 | 0.00 |
| ATOM | 2724 | HH22 | ARG | 170 | 1.827  | -18.516 | 18.242 | 1.00 | 0.00 |
| ATOM | 3096 | CB   | HIP | 194 | -2.891 | -23.783 | 17.759 | 1.00 | 0.00 |

|      |      |     |     |     |        |         |        |      |      |
|------|------|-----|-----|-----|--------|---------|--------|------|------|
| ATOM | 3099 | CG  | HIP | 194 | -2.686 | -22.380 | 18.275 | 1.00 | 0.00 |
| ATOM | 3100 | ND1 | HIP | 194 | -1.613 | -21.556 | 17.982 | 1.00 | 0.00 |
| ATOM | 3101 | HD1 | HIP | 194 | -0.934 | -21.709 | 17.229 | 1.00 | 0.00 |
| ATOM | 3102 | CE1 | HIP | 194 | -1.660 | -20.446 | 18.740 | 1.00 | 0.00 |
| ATOM | 3103 | HE1 | HIP | 194 | -0.945 | -19.633 | 18.732 | 1.00 | 0.00 |
| ATOM | 3104 | NE2 | HIP | 194 | -2.737 | -20.561 | 19.516 | 1.00 | 0.00 |
| ATOM | 3105 | HE2 | HIP | 194 | -3.088 | -19.883 | 20.191 | 1.00 | 0.00 |
| ATOM | 3106 | CD2 | HIP | 194 | -3.397 | -21.738 | 19.241 | 1.00 | 0.00 |
| ATOM | 3107 | HD2 | HIP | 194 | -4.278 | -22.018 | 19.784 | 1.00 | 0.00 |

END

## REMARK mSSTS1

|      |      |      |     |     |        |         |        |      |      |
|------|------|------|-----|-----|--------|---------|--------|------|------|
| ATOM | 1    | C1   | PYA | 1   | -0.485 | -17.652 | 21.507 | 1.00 | 0.00 |
| ATOM | 2    | O1   | PYA | 1   | -1.316 | -18.552 | 21.441 | 1.00 | 0.00 |
| ATOM | 3    | C2   | PYA | 1   | 0.671  | -17.570 | 20.466 | 1.00 | 0.00 |
| ATOM | 4    | O2   | PYA | 1   | 1.361  | -16.518 | 20.471 | 1.00 | 0.00 |
| ATOM | 5    | O3   | PYA | 1   | 0.798  | -18.597 | 19.743 | 1.00 | 0.00 |
| ATOM | 6    | C3   | PYA | 1   | -0.504 | -16.611 | 22.578 | 1.00 | 0.00 |
| ATOM | 7    | H1   | PYA | 1   | 0.466  | -16.608 | 23.084 | 1.00 | 0.00 |
| ATOM | 8    | H2   | PYA | 1   | -0.628 | -15.629 | 22.114 | 1.00 | 0.00 |
| ATOM | 9    | H3   | PYA | 1   | -1.323 | -16.798 | 23.273 | 1.00 | 0.00 |
| ATOM | 10   | C1   | NAD | 2   | -2.876 | -15.688 | 19.889 | 1.00 | 0.00 |
| ATOM | 11   | H1   | NAD | 2   | -2.824 | -15.287 | 18.875 | 1.00 | 0.00 |
| ATOM | 12   | H2   | NAD | 2   | -1.919 | -16.214 | 20.006 | 1.00 | 0.00 |
| ATOM | 13   | C2   | NAD | 2   | -4.024 | -16.670 | 20.004 | 1.00 | 0.00 |
| ATOM | 14   | C3   | NAD | 2   | -4.071 | -17.740 | 18.996 | 1.00 | 0.00 |
| ATOM | 15   | O1   | NAD | 2   | -3.107 | -17.926 | 18.237 | 1.00 | 0.00 |
| ATOM | 16   | N1   | NAD | 2   | -5.227 | -18.484 | 18.831 | 1.00 | 0.00 |
| ATOM | 17   | H3   | NAD | 2   | -5.950 | -18.432 | 19.547 | 1.00 | 0.00 |
| ATOM | 18   | H4   | NAD | 2   | -5.088 | -19.411 | 18.455 | 1.00 | 0.00 |
| ATOM | 19   | C4   | NAD | 2   | -3.025 | -14.595 | 20.916 | 1.00 | 0.00 |
| ATOM | 20   | H5   | NAD | 2   | -2.301 | -13.792 | 20.927 | 1.00 | 0.00 |
| ATOM | 21   | C5   | NAD | 2   | -4.934 | -16.567 | 21.000 | 1.00 | 0.00 |
| ATOM | 22   | H6   | NAD | 2   | -5.677 | -17.336 | 21.152 | 1.00 | 0.00 |
| ATOM | 23   | C6   | NAD | 2   | -4.001 | -14.564 | 21.830 | 1.00 | 0.00 |
| ATOM | 24   | H7   | NAD | 2   | -4.102 | -13.784 | 22.568 | 1.00 | 0.00 |
| ATOM | 25   | N2   | NAD | 2   | -4.983 | -15.559 | 21.923 | 1.00 | 0.00 |
| ATOM | 26   | C7   | NAD | 2   | -6.149 | -15.403 | 22.775 | 1.00 | 0.00 |
| ATOM | 2713 | CD   | ARG | 170 | 4.621  | -18.665 | 15.677 | 1.00 | 0.00 |
| ATOM | 2716 | NE   | ARG | 170 | 4.468  | -17.663 | 16.752 | 1.00 | 0.00 |
| ATOM | 2717 | HE   | ARG | 170 | 5.288  | -17.099 | 16.928 | 1.00 | 0.00 |
| ATOM | 2718 | CZ   | ARG | 170 | 3.445  | -17.580 | 17.644 | 1.00 | 0.00 |
| ATOM | 2719 | NH1  | ARG | 170 | 3.463  | -16.609 | 18.565 | 1.00 | 0.00 |
| ATOM | 2720 | HH11 | ARG | 170 | 4.377  | -16.216 | 18.754 | 1.00 | 0.00 |
| ATOM | 2721 | HH12 | ARG | 170 | 2.753  | -16.645 | 19.321 | 1.00 | 0.00 |
| ATOM | 2722 | NH2  | ARG | 170 | 2.376  | -18.378 | 17.555 | 1.00 | 0.00 |
| ATOM | 2723 | HH21 | ARG | 170 | 2.595  | -19.258 | 17.066 | 1.00 | 0.00 |
| ATOM | 2724 | HH22 | ARG | 170 | 1.774  | -18.499 | 18.404 | 1.00 | 0.00 |
| ATOM | 3096 | CB   | HIP | 194 | -3.474 | -23.314 | 17.866 | 1.00 | 0.00 |

|      |      |     |     |     |        |         |        |      |      |
|------|------|-----|-----|-----|--------|---------|--------|------|------|
| ATOM | 3099 | CG  | HIP | 194 | -2.736 | -22.060 | 18.252 | 1.00 | 0.00 |
| ATOM | 3100 | ND1 | HIP | 194 | -1.580 | -21.651 | 17.631 | 1.00 | 0.00 |
| ATOM | 3101 | HD1 | HIP | 194 | -1.148 | -22.047 | 16.791 | 1.00 | 0.00 |
| ATOM | 3102 | CE1 | HIP | 194 | -1.041 | -20.624 | 18.300 | 1.00 | 0.00 |
| ATOM | 3103 | HE1 | HIP | 194 | -0.129 | -20.131 | 18.015 | 1.00 | 0.00 |
| ATOM | 3104 | NE2 | HIP | 194 | -1.820 | -20.364 | 19.339 | 1.00 | 0.00 |
| ATOM | 3105 | HE2 | HIP | 194 | -1.621 | -19.616 | 20.030 | 1.00 | 0.00 |
| ATOM | 3106 | CD2 | HIP | 194 | -2.888 | -21.240 | 19.336 | 1.00 | 0.00 |
| ATOM | 3107 | HD2 | HIP | 194 | -3.648 | -21.228 | 20.098 | 1.00 | 0.00 |

END

## REMARK m(c)EQ2

|      |      |      |     |     |        |         |        |      |      |
|------|------|------|-----|-----|--------|---------|--------|------|------|
| ATOM | 1    | C1   | PYA | 1   | -0.511 | -17.657 | 21.589 | 1.00 | 0.00 |
| ATOM | 2    | O1   | PYA | 1   | -1.354 | -18.547 | 21.506 | 1.00 | 0.00 |
| ATOM | 3    | C2   | PYA | 1   | 0.711  | -17.665 | 20.629 | 1.00 | 0.00 |
| ATOM | 4    | O2   | PYA | 1   | 1.259  | -16.551 | 20.407 | 1.00 | 0.00 |
| ATOM | 5    | O3   | PYA | 1   | 1.044  | -18.812 | 20.217 | 1.00 | 0.00 |
| ATOM | 6    | C3   | PYA | 1   | -0.582 | -16.571 | 22.613 | 1.00 | 0.00 |
| ATOM | 7    | H1   | PYA | 1   | 0.356  | -16.535 | 23.174 | 1.00 | 0.00 |
| ATOM | 8    | H2   | PYA | 1   | -0.678 | -15.602 | 22.114 | 1.00 | 0.00 |
| ATOM | 9    | H3   | PYA | 1   | -1.440 | -16.725 | 23.267 | 1.00 | 0.00 |
| ATOM | 10   | C1   | NAD | 2   | -2.725 | -15.736 | 19.875 | 1.00 | 0.00 |
| ATOM | 11   | H1   | NAD | 2   | -2.644 | -15.354 | 18.857 | 1.00 | 0.00 |
| ATOM | 12   | H2   | NAD | 2   | -1.762 | -16.238 | 20.033 | 1.00 | 0.00 |
| ATOM | 13   | C2   | NAD | 2   | -3.860 | -16.733 | 19.967 | 1.00 | 0.00 |
| ATOM | 14   | C3   | NAD | 2   | -3.929 | -17.771 | 18.929 | 1.00 | 0.00 |
| ATOM | 15   | O1   | NAD | 2   | -2.976 | -17.955 | 18.153 | 1.00 | 0.00 |
| ATOM | 16   | N1   | NAD | 2   | -5.095 | -18.484 | 18.768 | 1.00 | 0.00 |
| ATOM | 17   | H3   | NAD | 2   | -5.869 | -18.380 | 19.419 | 1.00 | 0.00 |
| ATOM | 18   | H4   | NAD | 2   | -5.064 | -19.346 | 18.247 | 1.00 | 0.00 |
| ATOM | 19   | C4   | NAD | 2   | -2.925 | -14.630 | 20.882 | 1.00 | 0.00 |
| ATOM | 20   | H5   | NAD | 2   | -2.219 | -13.807 | 20.898 | 1.00 | 0.00 |
| ATOM | 21   | C5   | NAD | 2   | -4.767 | -16.664 | 20.967 | 1.00 | 0.00 |
| ATOM | 22   | H6   | NAD | 2   | -5.484 | -17.458 | 21.115 | 1.00 | 0.00 |
| ATOM | 23   | C6   | NAD | 2   | -3.915 | -14.622 | 21.783 | 1.00 | 0.00 |
| ATOM | 24   | H7   | NAD | 2   | -4.051 | -13.833 | 22.507 | 1.00 | 0.00 |
| ATOM | 25   | N2   | NAD | 2   | -4.852 | -15.660 | 21.889 | 1.00 | 0.00 |
| ATOM | 26   | C7   | NAD | 2   | -6.055 | -15.529 | 22.692 | 1.00 | 0.00 |
| ATOM | 2713 | CD   | ARG | 170 | 4.555  | -18.685 | 15.706 | 1.00 | 0.00 |
| ATOM | 2716 | NE   | ARG | 170 | 4.267  | -17.617 | 16.685 | 1.00 | 0.00 |
| ATOM | 2717 | HE   | ARG | 170 | 4.953  | -16.876 | 16.733 | 1.00 | 0.00 |
| ATOM | 2718 | CZ   | ARG | 170 | 3.300  | -17.604 | 17.637 | 1.00 | 0.00 |
| ATOM | 2719 | NH1  | ARG | 170 | 3.237  | -16.554 | 18.467 | 1.00 | 0.00 |
| ATOM | 2720 | HH11 | ARG | 170 | 4.153  | -16.132 | 18.630 | 1.00 | 0.00 |
| ATOM | 2721 | HH12 | ARG | 170 | 2.550  | -16.597 | 19.251 | 1.00 | 0.00 |
| ATOM | 2722 | NH2  | ARG | 170 | 2.338  | -18.545 | 17.687 | 1.00 | 0.00 |
| ATOM | 2723 | HH21 | ARG | 170 | 2.626  | -19.408 | 17.204 | 1.00 | 0.00 |
| ATOM | 2724 | HH22 | ARG | 170 | 1.938  | -18.733 | 18.622 | 1.00 | 0.00 |
| ATOM | 3096 | CB   | HIP | 194 | -3.387 | -23.318 | 17.909 | 1.00 | 0.00 |



|      |      |     |     |     |        |         |        |      |      |
|------|------|-----|-----|-----|--------|---------|--------|------|------|
| ATOM | 3099 | CG  | HIP | 194 | -2.743 | -22.000 | 18.259 | 1.00 | 0.00 |
| ATOM | 3100 | ND1 | HIP | 194 | -1.631 | -21.497 | 17.622 | 1.00 | 0.00 |
| ATOM | 3101 | HD1 | HIP | 194 | -1.246 | -21.767 | 16.714 | 1.00 | 0.00 |
| ATOM | 3102 | CE1 | HIP | 194 | -1.145 | -20.455 | 18.309 | 1.00 | 0.00 |
| ATOM | 3103 | HE1 | HIP | 194 | -0.295 | -19.876 | 17.989 | 1.00 | 0.00 |
| ATOM | 3104 | NE2 | HIP | 194 | -1.904 | -20.287 | 19.381 | 1.00 | 0.00 |
| ATOM | 3105 | HE2 | HIP | 194 | -1.745 | -19.564 | 20.108 | 1.00 | 0.00 |
| ATOM | 3106 | CD2 | HIP | 194 | -2.916 | -21.223 | 19.370 | 1.00 | 0.00 |
| ATOM | 3107 | HD2 | HIP | 194 | -3.658 | -21.273 | 20.148 | 1.00 | 0.00 |

END

## REMARK c(m)TS2

|      |      |      |     |     |        |         |        |      |      |
|------|------|------|-----|-----|--------|---------|--------|------|------|
| ATOM | 1    | C1   | PYA | 1   | -0.878 | -17.414 | 21.242 | 1.00 | 0.00 |
| ATOM | 2    | O1   | PYA | 1   | -1.631 | -18.491 | 21.321 | 1.00 | 0.00 |
| ATOM | 3    | C2   | PYA | 1   | 0.437  | -17.473 | 20.413 | 1.00 | 0.00 |
| ATOM | 4    | O2   | PYA | 1   | 0.970  | -16.366 | 20.127 | 1.00 | 0.00 |
| ATOM | 5    | O3   | PYA | 1   | 0.875  | -18.638 | 20.236 | 1.00 | 0.00 |
| ATOM | 6    | C3   | PYA | 1   | -0.763 | -16.628 | 22.523 | 1.00 | 0.00 |
| ATOM | 7    | H1   | PYA | 1   | 0.159  | -16.921 | 23.033 | 1.00 | 0.00 |
| ATOM | 8    | H2   | PYA | 1   | -0.695 | -15.556 | 22.324 | 1.00 | 0.00 |
| ATOM | 9    | H3   | PYA | 1   | -1.623 | -16.822 | 23.166 | 1.00 | 0.00 |
| ATOM | 10   | C1   | NAD | 2   | -2.585 | -15.810 | 20.043 | 1.00 | 0.00 |
| ATOM | 11   | H1   | NAD | 2   | -2.106 | -15.606 | 19.087 | 1.00 | 0.00 |
| ATOM | 12   | H2   | NAD | 2   | -1.618 | -16.500 | 20.496 | 1.00 | 0.00 |
| ATOM | 13   | C2   | NAD | 2   | -3.727 | -16.728 | 19.985 | 1.00 | 0.00 |
| ATOM | 14   | C3   | NAD | 2   | -3.768 | -17.723 | 18.875 | 1.00 | 0.00 |
| ATOM | 15   | O1   | NAD | 2   | -2.949 | -17.641 | 17.960 | 1.00 | 0.00 |
| ATOM | 16   | N1   | NAD | 2   | -4.773 | -18.657 | 18.875 | 1.00 | 0.00 |
| ATOM | 17   | H3   | NAD | 2   | -5.186 | -18.915 | 19.771 | 1.00 | 0.00 |
| ATOM | 18   | H4   | NAD | 2   | -4.632 | -19.459 | 18.275 | 1.00 | 0.00 |
| ATOM | 19   | C4   | NAD | 2   | -2.793 | -14.680 | 20.950 | 1.00 | 0.00 |
| ATOM | 20   | H5   | NAD | 2   | -2.076 | -13.869 | 20.976 | 1.00 | 0.00 |
| ATOM | 21   | C5   | NAD | 2   | -4.724 | -16.621 | 20.902 | 1.00 | 0.00 |
| ATOM | 22   | H6   | NAD | 2   | -5.529 | -17.334 | 20.932 | 1.00 | 0.00 |
| ATOM | 23   | C6   | NAD | 2   | -3.856 | -14.629 | 21.789 | 1.00 | 0.00 |
| ATOM | 24   | H7   | NAD | 2   | -4.034 | -13.810 | 22.469 | 1.00 | 0.00 |
| ATOM | 25   | N2   | NAD | 2   | -4.823 | -15.614 | 21.813 | 1.00 | 0.00 |
| ATOM | 26   | C7   | NAD | 2   | -6.045 | -15.474 | 22.599 | 1.00 | 0.00 |
| ATOM | 2713 | CD   | ARG | 170 | 4.508  | -18.736 | 15.745 | 1.00 | 0.00 |
| ATOM | 2716 | NE   | ARG | 170 | 4.228  | -17.670 | 16.727 | 1.00 | 0.00 |
| ATOM | 2717 | HE   | ARG | 170 | 4.911  | -16.925 | 16.768 | 1.00 | 0.00 |
| ATOM | 2718 | CZ   | ARG | 170 | 3.225  | -17.617 | 17.639 | 1.00 | 0.00 |
| ATOM | 2719 | NH1  | ARG | 170 | 3.156  | -16.548 | 18.443 | 1.00 | 0.00 |
| ATOM | 2720 | HH11 | ARG | 170 | 4.072  | -16.142 | 18.640 | 1.00 | 0.00 |
| ATOM | 2721 | HH12 | ARG | 170 | 2.407  | -16.530 | 19.166 | 1.00 | 0.00 |
| ATOM | 2722 | NH2  | ARG | 170 | 2.241  | -18.534 | 17.673 | 1.00 | 0.00 |
| ATOM | 2723 | HH21 | ARG | 170 | 2.513  | -19.413 | 17.208 | 1.00 | 0.00 |
| ATOM | 2724 | HH22 | ARG | 170 | 1.817  | -18.702 | 18.595 | 1.00 | 0.00 |
| ATOM | 3096 | CB   | HIP | 194 | -3.469 | -23.281 | 17.936 | 1.00 | 0.00 |

|      |      |     |     |     |        |         |        |      |      |
|------|------|-----|-----|-----|--------|---------|--------|------|------|
| ATOM | 3099 | CG  | HIP | 194 | -2.787 | -21.977 | 18.265 | 1.00 | 0.00 |
| ATOM | 3100 | ND1 | HIP | 194 | -1.668 | -21.515 | 17.618 | 1.00 | 0.00 |
| ATOM | 3101 | HD1 | HIP | 194 | -1.298 | -21.787 | 16.705 | 1.00 | 0.00 |
| ATOM | 3102 | CE1 | HIP | 194 | -1.176 | -20.460 | 18.306 | 1.00 | 0.00 |
| ATOM | 3103 | HE1 | HIP | 194 | -0.312 | -19.927 | 17.940 | 1.00 | 0.00 |
| ATOM | 3104 | NE2 | HIP | 194 | -1.904 | -20.221 | 19.381 | 1.00 | 0.00 |
| ATOM | 3105 | HE2 | HIP | 194 | -1.656 | -19.125 | 20.483 | 1.00 | 0.00 |
| ATOM | 3106 | CD2 | HIP | 194 | -2.916 | -21.165 | 19.365 | 1.00 | 0.00 |
| ATOM | 3107 | HD2 | HIP | 194 | -3.662 | -21.214 | 20.142 | 1.00 | 0.00 |

END

## REMARK c(m)EQ3

|      |      |      |     |     |        |         |        |      |      |
|------|------|------|-----|-----|--------|---------|--------|------|------|
| ATOM | 1    | C1   | PYA | 1   | -0.775 | -17.292 | 21.115 | 1.00 | 0.00 |
| ATOM | 2    | O1   | PYA | 1   | -1.522 | -18.443 | 21.402 | 1.00 | 0.00 |
| ATOM | 3    | C2   | PYA | 1   | 0.646  | -17.536 | 20.532 | 1.00 | 0.00 |
| ATOM | 4    | O2   | PYA | 1   | 1.277  | -16.462 | 20.253 | 1.00 | 0.00 |
| ATOM | 5    | O3   | PYA | 1   | 1.050  | -18.716 | 20.406 | 1.00 | 0.00 |
| ATOM | 6    | C3   | PYA | 1   | -0.690 | -16.434 | 22.375 | 1.00 | 0.00 |
| ATOM | 7    | H1   | PYA | 1   | 0.117  | -16.780 | 23.023 | 1.00 | 0.00 |
| ATOM | 8    | H2   | PYA | 1   | -0.490 | -15.391 | 22.122 | 1.00 | 0.00 |
| ATOM | 9    | H3   | PYA | 1   | -1.633 | -16.492 | 22.929 | 1.00 | 0.00 |
| ATOM | 10   | C1   | NAD | 2   | -2.988 | -15.543 | 19.887 | 1.00 | 0.00 |
| ATOM | 11   | H1   | NAD | 2   | -2.310 | -15.498 | 19.045 | 1.00 | 0.00 |
| ATOM | 12   | H2   | NAD | 2   | -1.275 | -16.705 | 20.318 | 1.00 | 0.00 |
| ATOM | 13   | C2   | NAD | 2   | -3.894 | -16.615 | 19.969 | 1.00 | 0.00 |
| ATOM | 14   | C3   | NAD | 2   | -3.886 | -17.667 | 18.882 | 1.00 | 0.00 |
| ATOM | 15   | O1   | NAD | 2   | -3.232 | -17.456 | 17.869 | 1.00 | 0.00 |
| ATOM | 16   | N1   | NAD | 2   | -4.689 | -18.751 | 19.059 | 1.00 | 0.00 |
| ATOM | 17   | H3   | NAD | 2   | -4.892 | -19.049 | 20.015 | 1.00 | 0.00 |
| ATOM | 18   | H4   | NAD | 2   | -4.500 | -19.549 | 18.464 | 1.00 | 0.00 |
| ATOM | 19   | C4   | NAD | 2   | -3.022 | -14.549 | 20.874 | 1.00 | 0.00 |
| ATOM | 20   | H5   | NAD | 2   | -2.293 | -13.750 | 20.896 | 1.00 | 0.00 |
| ATOM | 21   | C5   | NAD | 2   | -4.796 | -16.624 | 21.005 | 1.00 | 0.00 |
| ATOM | 22   | H6   | NAD | 2   | -5.482 | -17.439 | 21.161 | 1.00 | 0.00 |
| ATOM | 23   | C6   | NAD | 2   | -4.004 | -14.581 | 21.839 | 1.00 | 0.00 |
| ATOM | 24   | H7   | NAD | 2   | -4.126 | -13.822 | 22.597 | 1.00 | 0.00 |
| ATOM | 25   | N2   | NAD | 2   | -4.899 | -15.601 | 21.884 | 1.00 | 0.00 |
| ATOM | 26   | C7   | NAD | 2   | -6.084 | -15.531 | 22.734 | 1.00 | 0.00 |
| ATOM | 2713 | CD   | ARG | 170 | 4.525  | -18.799 | 15.734 | 1.00 | 0.00 |
| ATOM | 2716 | NE   | ARG | 170 | 4.242  | -17.732 | 16.713 | 1.00 | 0.00 |
| ATOM | 2717 | HE   | ARG | 170 | 4.948  | -17.013 | 16.782 | 1.00 | 0.00 |
| ATOM | 2718 | CZ   | ARG | 170 | 3.274  | -17.695 | 17.670 | 1.00 | 0.00 |
| ATOM | 2719 | NH1  | ARG | 170 | 3.233  | -16.640 | 18.486 | 1.00 | 0.00 |
| ATOM | 2720 | HH11 | ARG | 170 | 4.158  | -16.232 | 18.627 | 1.00 | 0.00 |
| ATOM | 2721 | HH12 | ARG | 170 | 2.514  | -16.634 | 19.272 | 1.00 | 0.00 |
| ATOM | 2722 | NH2  | ARG | 170 | 2.290  | -18.617 | 17.728 | 1.00 | 0.00 |
| ATOM | 2723 | HH21 | ARG | 170 | 2.557  | -19.491 | 17.251 | 1.00 | 0.00 |
| ATOM | 2724 | HH22 | ARG | 170 | 1.918  | -18.802 | 18.669 | 1.00 | 0.00 |
| ATOM | 3096 | CB   | HIP | 194 | -3.407 | -23.382 | 17.860 | 1.00 | 0.00 |

|      |      |     |     |     |        |         |        |      |      |
|------|------|-----|-----|-----|--------|---------|--------|------|------|
| ATOM | 3099 | CG  | HIP | 194 | -2.756 | -22.059 | 18.171 | 1.00 | 0.00 |
| ATOM | 3100 | ND1 | HIP | 194 | -1.669 | -21.564 | 17.499 | 1.00 | 0.00 |
| ATOM | 3101 | HD1 | HIP | 194 | -1.290 | -21.839 | 16.592 | 1.00 | 0.00 |
| ATOM | 3102 | CE1 | HIP | 194 | -1.207 | -20.479 | 18.173 | 1.00 | 0.00 |
| ATOM | 3103 | HE1 | HIP | 194 | -0.359 | -19.930 | 17.791 | 1.00 | 0.00 |
| ATOM | 3104 | NE2 | HIP | 194 | -1.924 | -20.250 | 19.255 | 1.00 | 0.00 |
| ATOM | 3105 | HE2 | HIP | 194 | -1.571 | -19.046 | 20.615 | 1.00 | 0.00 |
| ATOM | 3106 | CD2 | HIP | 194 | -2.892 | -21.238 | 19.265 | 1.00 | 0.00 |
| ATOM | 3107 | HD2 | HIP | 194 | -3.607 | -21.320 | 20.069 | 1.00 | 0.00 |

END

## REMARK mSSTS3

|      |      |      |     |     |        |         |        |      |      |
|------|------|------|-----|-----|--------|---------|--------|------|------|
| ATOM | 1    | C1   | PYA | 1   | -0.810 | -17.475 | 21.021 | 1.00 | 0.00 |
| ATOM | 2    | O1   | PYA | 1   | -1.449 | -18.674 | 21.394 | 1.00 | 0.00 |
| ATOM | 3    | C2   | PYA | 1   | 0.681  | -17.633 | 20.609 | 1.00 | 0.00 |
| ATOM | 4    | O2   | PYA | 1   | 1.271  | -16.527 | 20.353 | 1.00 | 0.00 |
| ATOM | 5    | O3   | PYA | 1   | 1.175  | -18.784 | 20.557 | 1.00 | 0.00 |
| ATOM | 6    | C3   | PYA | 1   | -0.921 | -16.498 | 22.188 | 1.00 | 0.00 |
| ATOM | 7    | H1   | PYA | 1   | -0.255 | -16.801 | 22.994 | 1.00 | 0.00 |
| ATOM | 8    | H2   | PYA | 1   | -0.637 | -15.490 | 21.882 | 1.00 | 0.00 |
| ATOM | 9    | H3   | PYA | 1   | -1.946 | -16.484 | 22.578 | 1.00 | 0.00 |
| ATOM | 10   | C1   | NAD | 2   | -3.021 | -15.229 | 19.990 | 1.00 | 0.00 |
| ATOM | 11   | H1   | NAD | 2   | -2.271 | -15.134 | 19.216 | 1.00 | 0.00 |
| ATOM | 12   | H2   | NAD | 2   | -1.289 | -17.049 | 20.121 | 1.00 | 0.00 |
| ATOM | 13   | C2   | NAD | 2   | -3.828 | -16.374 | 20.021 | 1.00 | 0.00 |
| ATOM | 14   | C3   | NAD | 2   | -3.706 | -17.408 | 18.920 | 1.00 | 0.00 |
| ATOM | 15   | O1   | NAD | 2   | -3.201 | -17.079 | 17.855 | 1.00 | 0.00 |
| ATOM | 16   | N1   | NAD | 2   | -4.252 | -18.621 | 19.175 | 1.00 | 0.00 |
| ATOM | 17   | H3   | NAD | 2   | -4.310 | -18.944 | 20.141 | 1.00 | 0.00 |
| ATOM | 18   | H4   | NAD | 2   | -4.022 | -19.384 | 18.550 | 1.00 | 0.00 |
| ATOM | 19   | C4   | NAD | 2   | -3.172 | -14.265 | 20.989 | 1.00 | 0.00 |
| ATOM | 20   | H5   | NAD | 2   | -2.521 | -13.405 | 21.047 | 1.00 | 0.00 |
| ATOM | 21   | C5   | NAD | 2   | -4.758 | -16.493 | 21.029 | 1.00 | 0.00 |
| ATOM | 22   | H6   | NAD | 2   | -5.362 | -17.378 | 21.146 | 1.00 | 0.00 |
| ATOM | 23   | C6   | NAD | 2   | -4.174 | -14.407 | 21.927 | 1.00 | 0.00 |
| ATOM | 24   | H7   | NAD | 2   | -4.370 | -13.695 | 22.714 | 1.00 | 0.00 |
| ATOM | 25   | N2   | NAD | 2   | -4.969 | -15.503 | 21.926 | 1.00 | 0.00 |
| ATOM | 26   | C7   | NAD | 2   | -6.147 | -15.562 | 22.785 | 1.00 | 0.00 |
| ATOM | 2713 | CD   | ARG | 170 | 4.336  | -18.742 | 15.678 | 1.00 | 0.00 |
| ATOM | 2716 | NE   | ARG | 170 | 4.087  | -17.697 | 16.692 | 1.00 | 0.00 |
| ATOM | 2717 | HE   | ARG | 170 | 4.806  | -16.990 | 16.760 | 1.00 | 0.00 |
| ATOM | 2718 | CZ   | ARG | 170 | 3.179  | -17.697 | 17.707 | 1.00 | 0.00 |
| ATOM | 2719 | NH1  | ARG | 170 | 3.201  | -16.688 | 18.578 | 1.00 | 0.00 |
| ATOM | 2720 | HH11 | ARG | 170 | 4.141  | -16.309 | 18.701 | 1.00 | 0.00 |
| ATOM | 2721 | HH12 | ARG | 170 | 2.498  | -16.689 | 19.385 | 1.00 | 0.00 |
| ATOM | 2722 | NH2  | ARG | 170 | 2.180  | -18.606 | 17.776 | 1.00 | 0.00 |
| ATOM | 2723 | HH21 | ARG | 170 | 2.401  | -19.455 | 17.236 | 1.00 | 0.00 |
| ATOM | 2724 | HH22 | ARG | 170 | 1.891  | -18.846 | 18.733 | 1.00 | 0.00 |
| ATOM | 3096 | CB   | HIP | 194 | -3.495 | -23.488 | 17.780 | 1.00 | 0.00 |

|      |      |     |     |     |        |         |        |      |      |
|------|------|-----|-----|-----|--------|---------|--------|------|------|
| ATOM | 3099 | CG  | HIP | 194 | -2.802 | -22.188 | 18.087 | 1.00 | 0.00 |
| ATOM | 3100 | ND1 | HIP | 194 | -1.704 | -21.740 | 17.404 | 1.00 | 0.00 |
| ATOM | 3101 | HD1 | HIP | 194 | -1.371 | -21.986 | 16.472 | 1.00 | 0.00 |
| ATOM | 3102 | CE1 | HIP | 194 | -1.165 | -20.699 | 18.090 | 1.00 | 0.00 |
| ATOM | 3103 | HE1 | HIP | 194 | -0.297 | -20.191 | 17.693 | 1.00 | 0.00 |
| ATOM | 3104 | NE2 | HIP | 194 | -1.842 | -20.456 | 19.194 | 1.00 | 0.00 |
| ATOM | 3105 | HE2 | HIP | 194 | -1.491 | -19.289 | 20.622 | 1.00 | 0.00 |
| ATOM | 3106 | CD2 | HIP | 194 | -2.866 | -21.388 | 19.204 | 1.00 | 0.00 |
| ATOM | 3107 | HD2 | HIP | 194 | -3.562 | -21.451 | 20.027 | 1.00 | 0.00 |

END

## REMARK cTS1

|      |      |      |     |     |        |         |        |      |      |
|------|------|------|-----|-----|--------|---------|--------|------|------|
| ATOM | 1    | C1   | PYA | 1   | -0.530 | -17.574 | 21.519 | 1.00 | 0.00 |
| ATOM | 2    | O1   | PYA | 1   | -1.344 | -18.490 | 21.501 | 1.00 | 0.00 |
| ATOM | 3    | C2   | PYA | 1   | 0.619  | -17.548 | 20.466 | 1.00 | 0.00 |
| ATOM | 4    | O2   | PYA | 1   | 1.201  | -16.445 | 20.290 | 1.00 | 0.00 |
| ATOM | 5    | O3   | PYA | 1   | 0.908  | -18.682 | 19.969 | 1.00 | 0.00 |
| ATOM | 6    | C3   | PYA | 1   | -0.545 | -16.494 | 22.556 | 1.00 | 0.00 |
| ATOM | 7    | H1   | PYA | 1   | 0.391  | -16.516 | 23.125 | 1.00 | 0.00 |
| ATOM | 8    | H2   | PYA | 1   | -0.604 | -15.519 | 22.069 | 1.00 | 0.00 |
| ATOM | 9    | H3   | PYA | 1   | -1.410 | -16.630 | 23.205 | 1.00 | 0.00 |
| ATOM | 10   | C1   | NAD | 2   | -2.721 | -15.674 | 19.877 | 1.00 | 0.00 |
| ATOM | 11   | H1   | NAD | 2   | -2.644 | -15.286 | 18.863 | 1.00 | 0.00 |
| ATOM | 12   | H2   | NAD | 2   | -1.744 | -16.148 | 20.042 | 1.00 | 0.00 |
| ATOM | 13   | C2   | NAD | 2   | -3.820 | -16.711 | 19.964 | 1.00 | 0.00 |
| ATOM | 14   | C3   | NAD | 2   | -3.901 | -17.691 | 18.870 | 1.00 | 0.00 |
| ATOM | 15   | O1   | NAD | 2   | -2.972 | -17.799 | 18.052 | 1.00 | 0.00 |
| ATOM | 16   | N1   | NAD | 2   | -5.037 | -18.467 | 18.736 | 1.00 | 0.00 |
| ATOM | 17   | H3   | NAD | 2   | -5.884 | -18.200 | 19.237 | 1.00 | 0.00 |
| ATOM | 18   | H4   | NAD | 2   | -5.195 | -18.909 | 17.841 | 1.00 | 0.00 |
| ATOM | 19   | C4   | NAD | 2   | -2.950 | -14.587 | 20.897 | 1.00 | 0.00 |
| ATOM | 20   | H5   | NAD | 2   | -2.287 | -13.730 | 20.895 | 1.00 | 0.00 |
| ATOM | 21   | C5   | NAD | 2   | -4.733 | -16.677 | 20.962 | 1.00 | 0.00 |
| ATOM | 22   | H6   | NAD | 2   | -5.420 | -17.500 | 21.106 | 1.00 | 0.00 |
| ATOM | 23   | C6   | NAD | 2   | -3.949 | -14.609 | 21.787 | 1.00 | 0.00 |
| ATOM | 24   | H7   | NAD | 2   | -4.113 | -13.823 | 22.511 | 1.00 | 0.00 |
| ATOM | 25   | N2   | NAD | 2   | -4.837 | -15.689 | 21.900 | 1.00 | 0.00 |
| ATOM | 26   | C7   | NAD | 2   | -6.055 | -15.586 | 22.684 | 1.00 | 0.00 |
| ATOM | 2713 | CD   | ARG | 170 | 4.673  | -18.691 | 15.733 | 1.00 | 0.00 |
| ATOM | 2716 | NE   | ARG | 170 | 4.387  | -17.630 | 16.720 | 1.00 | 0.00 |
| ATOM | 2717 | HE   | ARG | 170 | 5.079  | -16.900 | 16.809 | 1.00 | 0.00 |
| ATOM | 2718 | CZ   | ARG | 170 | 3.345  | -17.587 | 17.587 | 1.00 | 0.00 |
| ATOM | 2719 | NH1  | ARG | 170 | 3.227  | -16.512 | 18.381 | 1.00 | 0.00 |
| ATOM | 2720 | HH11 | ARG | 170 | 4.115  | -16.045 | 18.545 | 1.00 | 0.00 |
| ATOM | 2721 | HH12 | ARG | 170 | 2.510  | -16.531 | 19.134 | 1.00 | 0.00 |
| ATOM | 2722 | NH2  | ARG | 170 | 2.395  | -18.534 | 17.603 | 1.00 | 0.00 |
| ATOM | 2723 | HH21 | ARG | 170 | 2.713  | -19.412 | 17.185 | 1.00 | 0.00 |
| ATOM | 2724 | HH22 | ARG | 170 | 1.868  | -18.653 | 18.489 | 1.00 | 0.00 |
| ATOM | 3096 | CB   | HIP | 194 | -3.250 | -23.497 | 17.867 | 1.00 | 0.00 |



|      |      |     |     |     |        |         |        |      |      |
|------|------|-----|-----|-----|--------|---------|--------|------|------|
| ATOM | 3099 | CG  | HIP | 194 | -2.755 | -22.125 | 18.256 | 1.00 | 0.00 |
| ATOM | 3100 | ND1 | HIP | 194 | -1.615 | -21.530 | 17.746 | 1.00 | 0.00 |
| ATOM | 3101 | HD1 | HIP | 194 | -1.104 | -21.777 | 16.894 | 1.00 | 0.00 |
| ATOM | 3102 | CE1 | HIP | 194 | -1.335 | -20.430 | 18.458 | 1.00 | 0.00 |
| ATOM | 3103 | HE1 | HIP | 194 | -0.516 | -19.764 | 18.278 | 1.00 | 0.00 |
| ATOM | 3104 | NE2 | HIP | 194 | -2.256 | -20.323 | 19.408 | 1.00 | 0.00 |
| ATOM | 3105 | HE2 | HIP | 194 | -2.259 | -19.596 | 20.131 | 1.00 | 0.00 |
| ATOM | 3106 | CD2 | HIP | 194 | -3.158 | -21.358 | 19.308 | 1.00 | 0.00 |
| ATOM | 3107 | HD2 | HIP | 194 | -3.994 | -21.464 | 19.977 | 1.00 | 0.00 |

END

## REMARK cTS3

|      |      |      |     |     |        |         |        |      |      |
|------|------|------|-----|-----|--------|---------|--------|------|------|
| ATOM | 1    | C1   | PYA | 1   | -0.828 | -17.535 | 21.050 | 1.00 | 0.00 |
| ATOM | 2    | O1   | PYA | 1   | -1.455 | -18.740 | 21.423 | 1.00 | 0.00 |
| ATOM | 3    | C2   | PYA | 1   | 0.677  | -17.652 | 20.678 | 1.00 | 0.00 |
| ATOM | 4    | O2   | PYA | 1   | 1.239  | -16.528 | 20.430 | 1.00 | 0.00 |
| ATOM | 5    | O3   | PYA | 1   | 1.214  | -18.784 | 20.661 | 1.00 | 0.00 |
| ATOM | 6    | C3   | PYA | 1   | -0.980 | -16.556 | 22.211 | 1.00 | 0.00 |
| ATOM | 7    | H1   | PYA | 1   | -0.338 | -16.862 | 23.038 | 1.00 | 0.00 |
| ATOM | 8    | H2   | PYA | 1   | -0.689 | -15.548 | 21.917 | 1.00 | 0.00 |
| ATOM | 9    | H3   | PYA | 1   | -2.018 | -16.546 | 22.566 | 1.00 | 0.00 |
| ATOM | 10   | C1   | NAD | 2   | -2.977 | -15.135 | 19.954 | 1.00 | 0.00 |
| ATOM | 11   | H1   | NAD | 2   | -2.217 | -14.999 | 19.195 | 1.00 | 0.00 |
| ATOM | 12   | H2   | NAD | 2   | -1.299 | -17.124 | 20.137 | 1.00 | 0.00 |
| ATOM | 13   | C2   | NAD | 2   | -3.778 | -16.285 | 19.934 | 1.00 | 0.00 |
| ATOM | 14   | C3   | NAD | 2   | -3.653 | -17.304 | 18.815 | 1.00 | 0.00 |
| ATOM | 15   | O1   | NAD | 2   | -3.371 | -16.934 | 17.685 | 1.00 | 0.00 |
| ATOM | 16   | N1   | NAD | 2   | -3.942 | -18.572 | 19.178 | 1.00 | 0.00 |
| ATOM | 17   | H3   | NAD | 2   | -3.803 | -18.864 | 20.147 | 1.00 | 0.00 |
| ATOM | 18   | H4   | NAD | 2   | -3.751 | -19.327 | 18.531 | 1.00 | 0.00 |
| ATOM | 19   | C4   | NAD | 2   | -3.137 | -14.216 | 20.993 | 1.00 | 0.00 |
| ATOM | 20   | H5   | NAD | 2   | -2.481 | -13.364 | 21.090 | 1.00 | 0.00 |
| ATOM | 21   | C5   | NAD | 2   | -4.718 | -16.444 | 20.923 | 1.00 | 0.00 |
| ATOM | 22   | H6   | NAD | 2   | -5.332 | -17.332 | 20.982 | 1.00 | 0.00 |
| ATOM | 23   | C6   | NAD | 2   | -4.144 | -14.399 | 21.920 | 1.00 | 0.00 |
| ATOM | 24   | H7   | NAD | 2   | -4.348 | -13.717 | 22.735 | 1.00 | 0.00 |
| ATOM | 25   | N2   | NAD | 2   | -4.940 | -15.494 | 21.864 | 1.00 | 0.00 |
| ATOM | 26   | C7   | NAD | 2   | -6.141 | -15.592 | 22.681 | 1.00 | 0.00 |
| ATOM | 2713 | CD   | ARG | 170 | 4.259  | -18.683 | 15.672 | 1.00 | 0.00 |
| ATOM | 2716 | NE   | ARG | 170 | 3.973  | -17.622 | 16.663 | 1.00 | 0.00 |
| ATOM | 2717 | HE   | ARG | 170 | 4.704  | -16.927 | 16.759 | 1.00 | 0.00 |
| ATOM | 2718 | CZ   | ARG | 170 | 3.081  | -17.650 | 17.691 | 1.00 | 0.00 |
| ATOM | 2719 | NH1  | ARG | 170 | 3.116  | -16.672 | 18.594 | 1.00 | 0.00 |
| ATOM | 2720 | HH11 | ARG | 170 | 4.078  | -16.360 | 18.755 | 1.00 | 0.00 |
| ATOM | 2721 | HH12 | ARG | 170 | 2.428  | -16.701 | 19.416 | 1.00 | 0.00 |
| ATOM | 2722 | NH2  | ARG | 170 | 2.063  | -18.552 | 17.737 | 1.00 | 0.00 |
| ATOM | 2723 | HH21 | ARG | 170 | 2.285  | -19.380 | 17.162 | 1.00 | 0.00 |
| ATOM | 2724 | HH22 | ARG | 170 | 1.842  | -18.854 | 18.690 | 1.00 | 0.00 |
| ATOM | 3096 | CB   | HIP | 194 | -3.565 | -23.503 | 17.778 | 1.00 | 0.00 |

|      |      |     |     |     |        |         |        |      |      |
|------|------|-----|-----|-----|--------|---------|--------|------|------|
| ATOM | 3099 | CG  | HIP | 194 | -2.840 | -22.238 | 18.126 | 1.00 | 0.00 |
| ATOM | 3100 | ND1 | HIP | 194 | -1.770 | -21.766 | 17.421 | 1.00 | 0.00 |
| ATOM | 3101 | HD1 | HIP | 194 | -1.469 | -21.968 | 16.469 | 1.00 | 0.00 |
| ATOM | 3102 | CE1 | HIP | 194 | -1.189 | -20.773 | 18.143 | 1.00 | 0.00 |
| ATOM | 3103 | HE1 | HIP | 194 | -0.317 | -20.271 | 17.748 | 1.00 | 0.00 |
| ATOM | 3104 | NE2 | HIP | 194 | -1.817 | -20.585 | 19.286 | 1.00 | 0.00 |
| ATOM | 3105 | HE2 | HIP | 194 | -1.436 | -19.390 | 20.679 | 1.00 | 0.00 |
| ATOM | 3106 | CD2 | HIP | 194 | -2.853 | -21.505 | 19.287 | 1.00 | 0.00 |
| ATOM | 3107 | HD2 | HIP | 194 | -3.506 | -21.638 | 20.135 | 1.00 | 0.00 |

END

## REMARK cEQ4

|      |      |      |     |     |        |         |        |      |      |
|------|------|------|-----|-----|--------|---------|--------|------|------|
| ATOM | 1    | C1   | PYA | 1   | -0.659 | -17.256 | 21.256 | 1.00 | 0.00 |
| ATOM | 2    | O1   | PYA | 1   | -1.425 | -18.404 | 21.514 | 1.00 | 0.00 |
| ATOM | 3    | C2   | PYA | 1   | 0.806  | -17.503 | 20.802 | 1.00 | 0.00 |
| ATOM | 4    | O2   | PYA | 1   | 1.475  | -16.429 | 20.615 | 1.00 | 0.00 |
| ATOM | 5    | O3   | PYA | 1   | 1.207  | -18.684 | 20.676 | 1.00 | 0.00 |
| ATOM | 6    | C3   | PYA | 1   | -0.651 | -16.391 | 22.509 | 1.00 | 0.00 |
| ATOM | 7    | H1   | PYA | 1   | -0.014 | -16.843 | 23.270 | 1.00 | 0.00 |
| ATOM | 8    | H2   | PYA | 1   | -0.250 | -15.404 | 22.282 | 1.00 | 0.00 |
| ATOM | 9    | H3   | PYA | 1   | -1.664 | -16.295 | 22.918 | 1.00 | 0.00 |
| ATOM | 10   | C1   | NAD | 2   | -2.916 | -15.694 | 19.645 | 1.00 | 0.00 |
| ATOM | 11   | H1   | NAD | 2   | -2.244 | -15.662 | 18.797 | 1.00 | 0.00 |
| ATOM | 12   | H2   | NAD | 2   | -1.100 | -16.684 | 20.414 | 1.00 | 0.00 |
| ATOM | 13   | C2   | NAD | 2   | -3.856 | -16.733 | 19.728 | 1.00 | 0.00 |
| ATOM | 14   | C3   | NAD | 2   | -3.971 | -17.718 | 18.579 | 1.00 | 0.00 |
| ATOM | 15   | O1   | NAD | 2   | -3.519 | -17.404 | 17.482 | 1.00 | 0.00 |
| ATOM | 16   | N1   | NAD | 2   | -4.667 | -18.859 | 18.825 | 1.00 | 0.00 |
| ATOM | 17   | H3   | NAD | 2   | -4.687 | -19.213 | 19.782 | 1.00 | 0.00 |
| ATOM | 18   | H4   | NAD | 2   | -4.550 | -19.617 | 18.159 | 1.00 | 0.00 |
| ATOM | 19   | C4   | NAD | 2   | -2.882 | -14.726 | 20.653 | 1.00 | 0.00 |
| ATOM | 20   | H5   | NAD | 2   | -2.117 | -13.964 | 20.669 | 1.00 | 0.00 |
| ATOM | 21   | C5   | NAD | 2   | -4.697 | -16.759 | 20.820 | 1.00 | 0.00 |
| ATOM | 22   | H6   | NAD | 2   | -5.388 | -17.570 | 20.983 | 1.00 | 0.00 |
| ATOM | 23   | C6   | NAD | 2   | -3.815 | -14.760 | 21.666 | 1.00 | 0.00 |
| ATOM | 24   | H7   | NAD | 2   | -3.877 | -14.018 | 22.448 | 1.00 | 0.00 |
| ATOM | 25   | N2   | NAD | 2   | -4.721 | -15.767 | 21.741 | 1.00 | 0.00 |
| ATOM | 26   | C7   | NAD | 2   | -5.829 | -15.702 | 22.699 | 1.00 | 0.00 |
| ATOM | 2713 | CD   | ARG | 170 | 4.100  | -18.615 | 15.687 | 1.00 | 0.00 |
| ATOM | 2716 | NE   | ARG | 170 | 3.996  | -17.574 | 16.730 | 1.00 | 0.00 |
| ATOM | 2717 | HE   | ARG | 170 | 4.860  | -17.057 | 16.870 | 1.00 | 0.00 |
| ATOM | 2718 | CZ   | ARG | 170 | 3.108  | -17.515 | 17.759 | 1.00 | 0.00 |
| ATOM | 2719 | NH1  | ARG | 170 | 3.247  | -16.566 | 18.682 | 1.00 | 0.00 |
| ATOM | 2720 | HH11 | ARG | 170 | 4.229  | -16.310 | 18.811 | 1.00 | 0.00 |
| ATOM | 2721 | HH12 | ARG | 170 | 2.605  | -16.595 | 19.536 | 1.00 | 0.00 |
| ATOM | 2722 | NH2  | ARG | 170 | 2.000  | -18.302 | 17.794 | 1.00 | 0.00 |
| ATOM | 2723 | HH21 | ARG | 170 | 2.144  | -19.144 | 17.214 | 1.00 | 0.00 |
| ATOM | 2724 | HH22 | ARG | 170 | 1.777  | -18.608 | 18.752 | 1.00 | 0.00 |
| ATOM | 3096 | CB   | HIP | 194 | -3.709 | -23.209 | 17.830 | 1.00 | 0.00 |

|      |      |     |     |     |        |         |        |      |      |
|------|------|-----|-----|-----|--------|---------|--------|------|------|
| ATOM | 3099 | CG  | HIP | 194 | -2.961 | -21.970 | 18.245 | 1.00 | 0.00 |
| ATOM | 3100 | ND1 | HIP | 194 | -1.965 | -21.391 | 17.510 | 1.00 | 0.00 |
| ATOM | 3101 | HD1 | HIP | 194 | -1.681 | -21.573 | 16.548 | 1.00 | 0.00 |
| ATOM | 3102 | CE1 | HIP | 194 | -1.399 | -20.407 | 18.255 | 1.00 | 0.00 |
| ATOM | 3103 | HE1 | HIP | 194 | -0.583 | -19.827 | 17.847 | 1.00 | 0.00 |
| ATOM | 3104 | NE2 | HIP | 194 | -1.971 | -20.315 | 19.439 | 1.00 | 0.00 |
| ATOM | 3105 | HE2 | HIP | 194 | -1.442 | -19.030 | 20.751 | 1.00 | 0.00 |
| ATOM | 3106 | CD2 | HIP | 194 | -2.944 | -21.300 | 19.445 | 1.00 | 0.00 |
| ATOM | 3107 | HD2 | HIP | 194 | -3.543 | -21.525 | 20.313 | 1.00 | 0.00 |

END

### **Full reference of the Gaussian 09 program:**

Gaussian 09, Revision E01, Frisch, M. J.; Trucks, G. W.; Schlegel, H. B.; Scuseria, G. E.; Robb, M. A.; Cheeseman, J. R.; Scalmani, G.; Barone, V.; Mennucci, B.; Petersson, G. A.; Nakatsuji, H.; Caricato, M.; Li, X.; Hratchian, H. P.; Izmaylov, A. F.; Bloino, J.; Zheng, G.; Sonnenberg, J. L.; Hada, M.; Ehara, M.; Toyota, K.; Fukuda, R.; Hasegawa, J.; Ishida, M.; Nakajima, T.; Honda, Y.; Kitao, O.; Nakai, H.; Vreven, T.; Montgomery, J. A., Jr.; Peralta, J. E.; Ogliaro, F.; Bearpark, M.; Heyd, J. J.; Brothers, E.; Kudin, K. N.; Staroverov, V. N.; Kobayashi, R.; Normand, J.; Raghavachari, K.; Rendell, A.; Burant, J. C.; Iyengar, S. S.; Tomasi, J.; Cossi, M.; Rega, N.; Millam, N. J.; Klene, M.; Knox, J. E.; Cross, J. B.; Bakken, V.; Adamo, C.; Jaramillo, J.; Gomperts, R.; Stratmann, R. E.; Yazyev, O.; Austin, A. J.; Cammi, R.; Pomelli, C.; Ochterski, J. W.; Martin, R. L.; Morokuma, K.; Zakrzewski, V. G.; Voth, G. A.; Salvador, P.; Dannenberg, J. J.; Dapprich, S.; Daniels, A. D.; Farkas, Ö.; Foresman, J. B.; Ortiz, J. V.; Cioslowski, J.; Fox, D. J. Gaussian, Inc., Wallingford CT, 2013.
